# Supplementary material for: Developmental expression of “germline”- and “sex determination”-related genes in the ctenophore Mnemiopsis leidyi
Source: Springer Nature journal article supplement (doi:10.1186/s13227-016-0051-9), 2016-08-02
Supplement: MOESM2 [file 13227_2016_51_MOESM2_ESM.pdf]

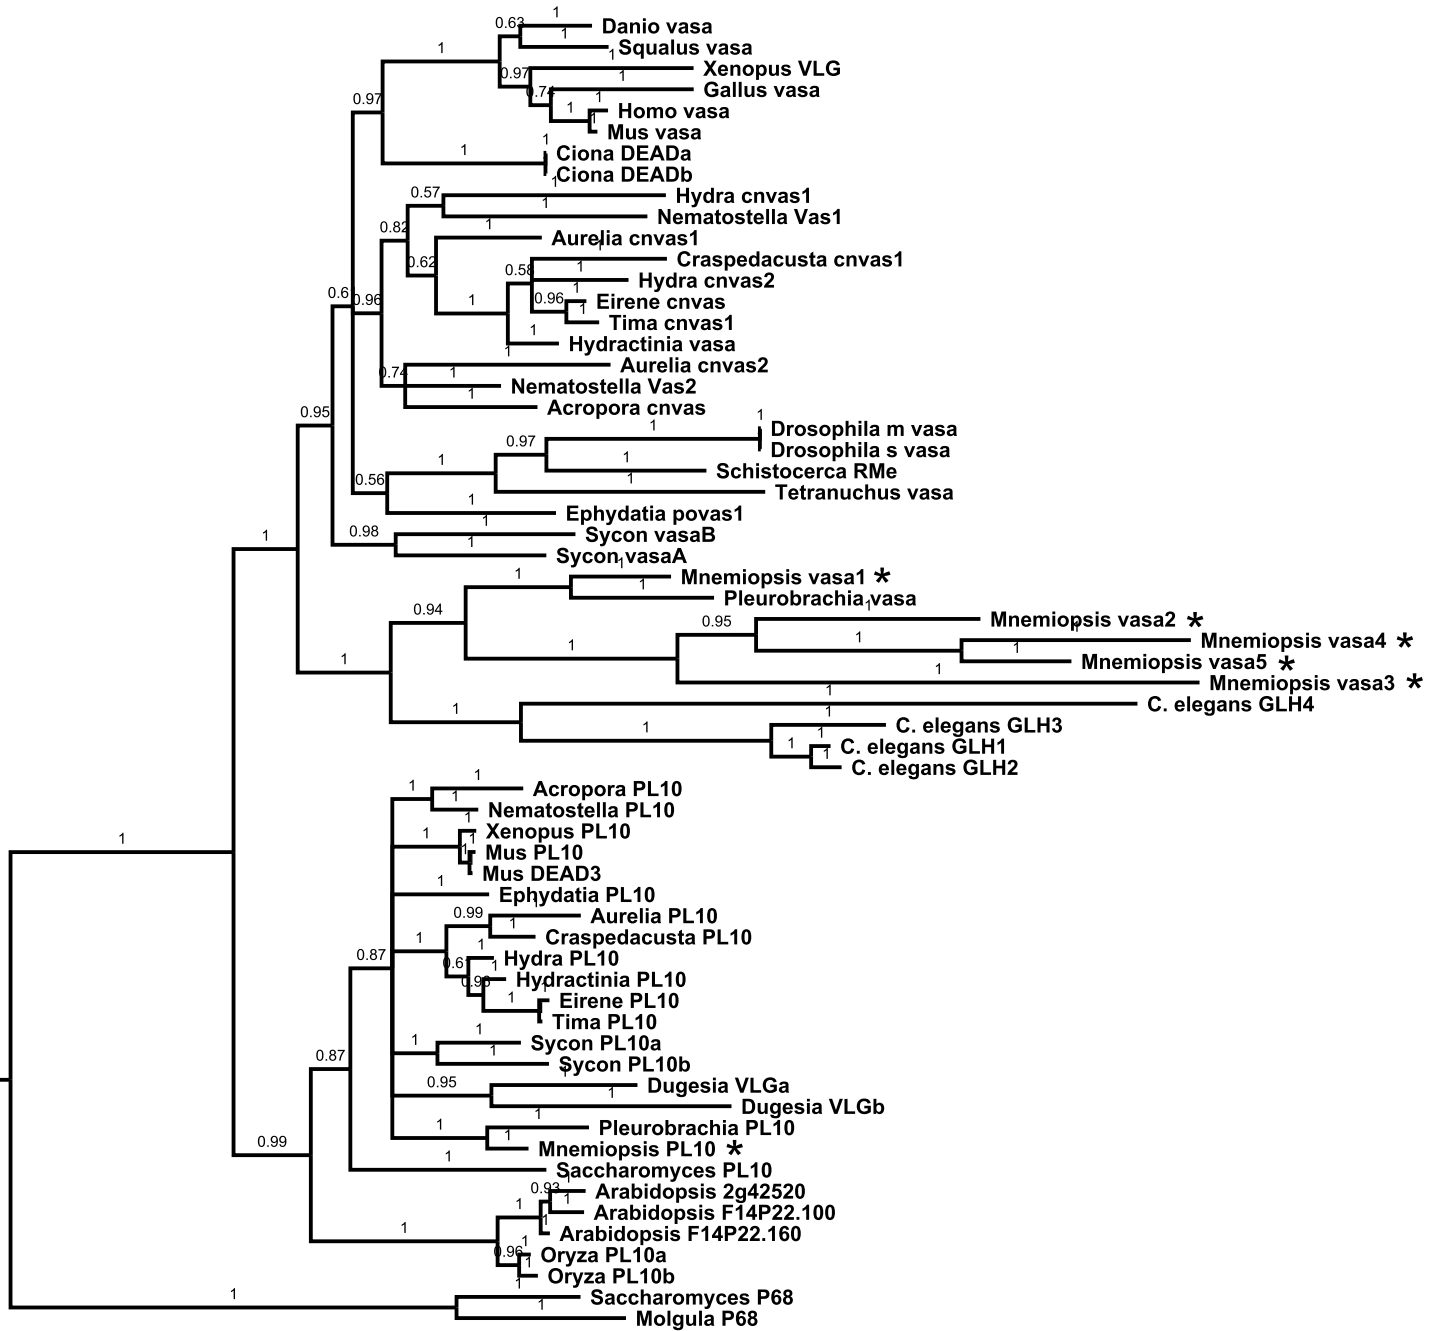

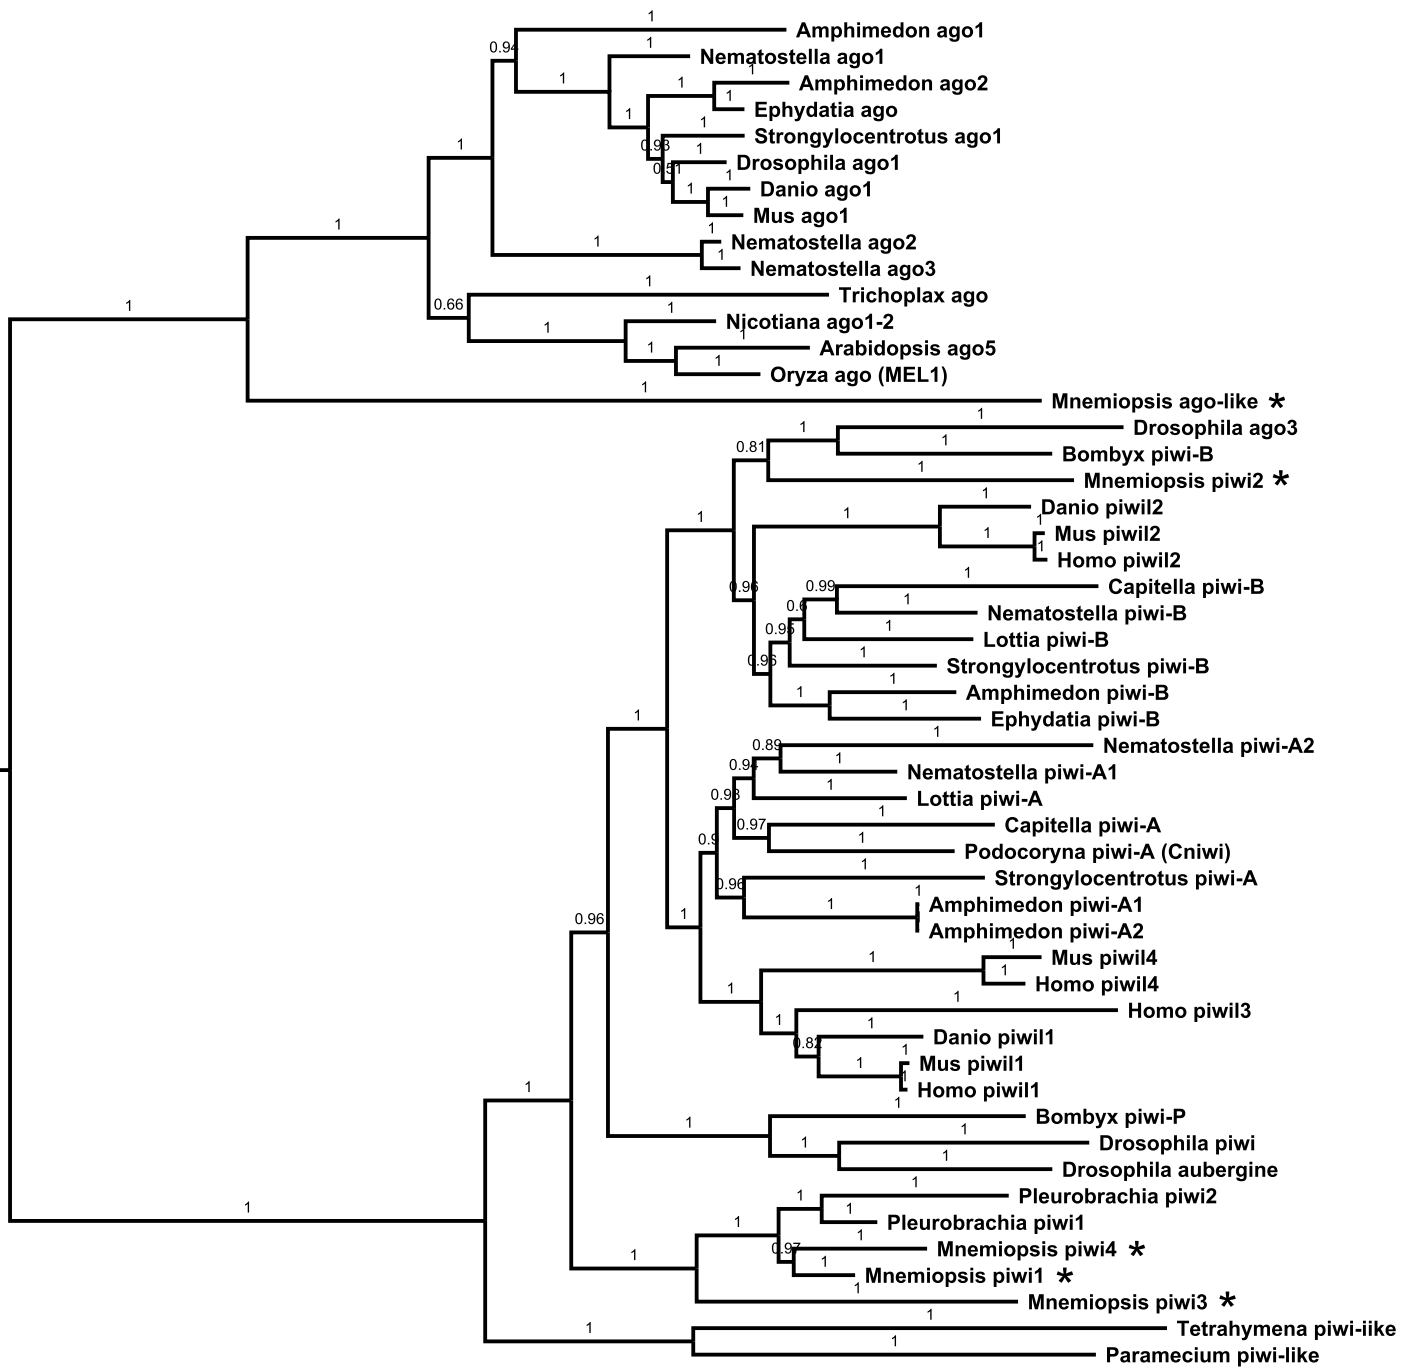

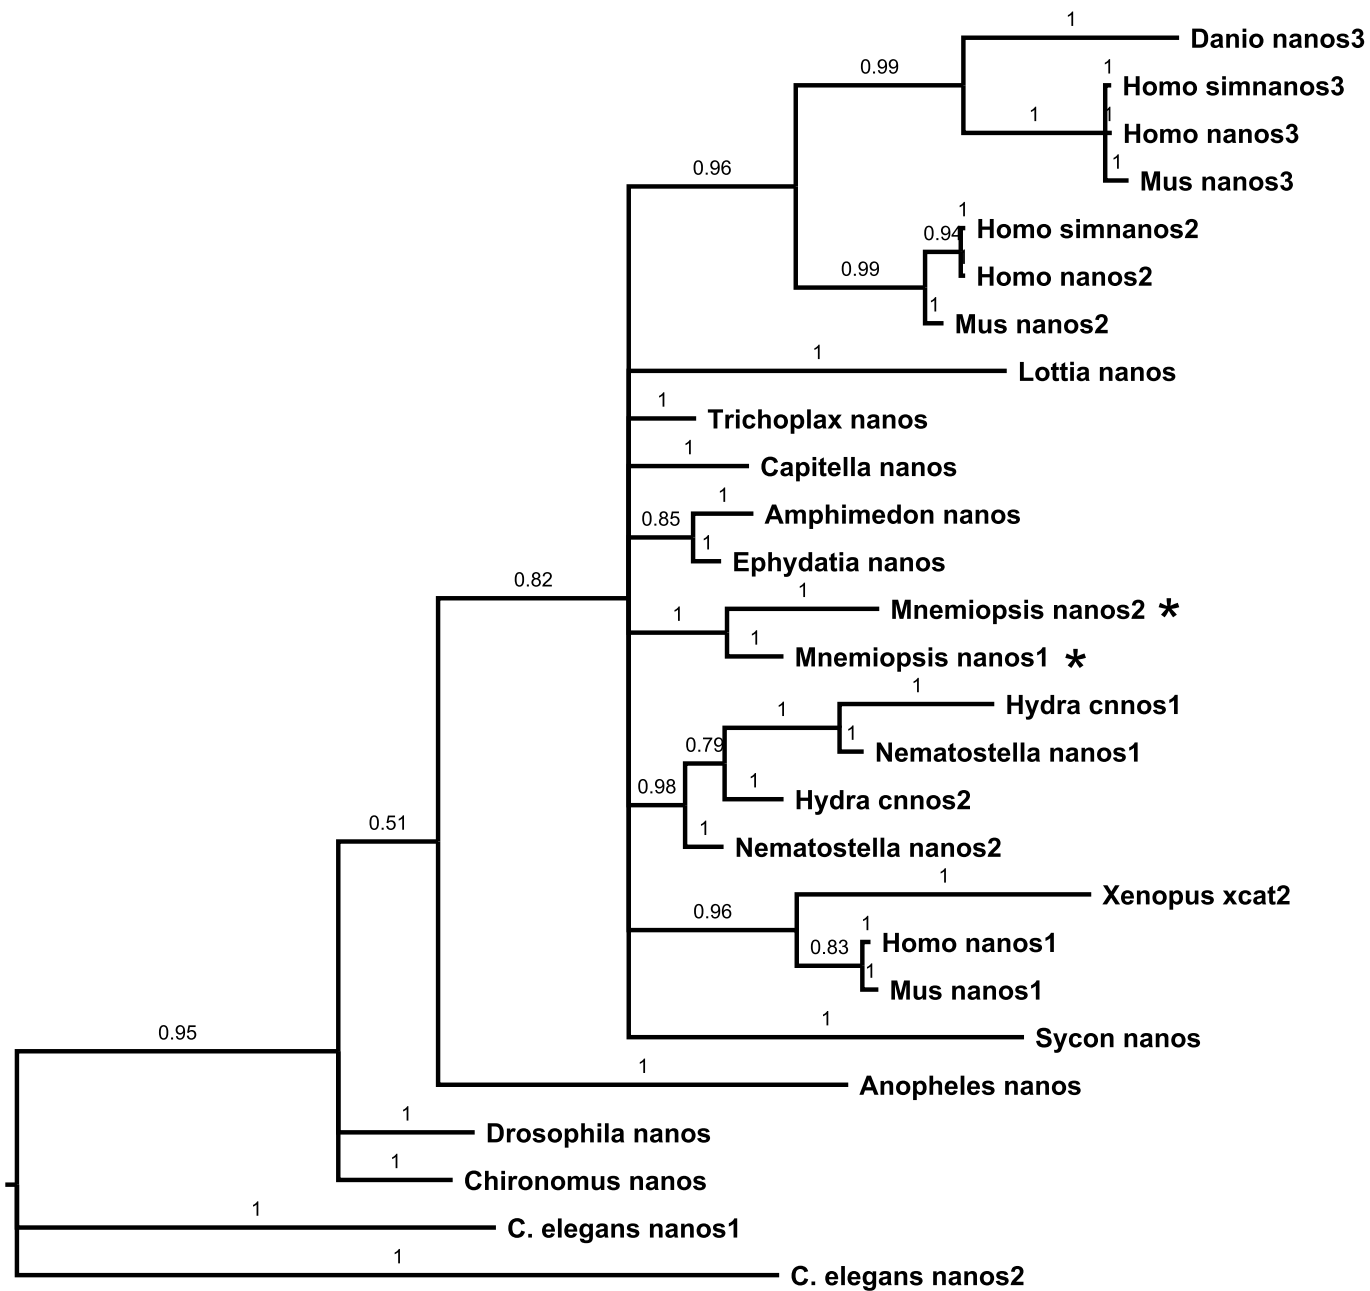

0.3
